# Supplementary material for: An open source automated tumor infiltrating lymphocyte algorithm for prognosis in melanoma
Source: PubMed Central journal article supplement (PMC6884485; doi:10.1038/s41467-019-13043-2), 2019-11-29

## **Supplementary Information**

### **An Open Source Automated Tumor Infiltrating Lymphocyte Algorithm for Prognosis in Melanoma**

*Acs et al.*

**List of Content**

**Supplementary Figure Legends**

**Supplementary Figures 1-3**

**Supplementary Tables 1-2**

## Supplementary Figure Legends

### Supplementary Figure 1

Association between eTIL% score and the clinicopathological factors in cohort #1, #2, #3 and #4. eTIL% score was higher in cases with absent ulceration and smaller tumor depth in cohorts #1, #2 and #3. No significant association was found between eTIL% and any clinicopathological factor in cohort#4.

### Supplementary Figure 2

Reproducibility between corresponding TMA and WSI cases regarding eTIL% scores. Intra-class correlation coefficient (ICC).

### Supplementary Figure 3

Automated TIL scoring in whole slide cohorts. In the whole slide cohorts (cohort #2 and #4), the analysis was run on the entire tumor area (A, C, D) following pathologists' markings (B). One whole slide per patient selected by a pathologist was investigated in the study.

Supplementary Figure 1

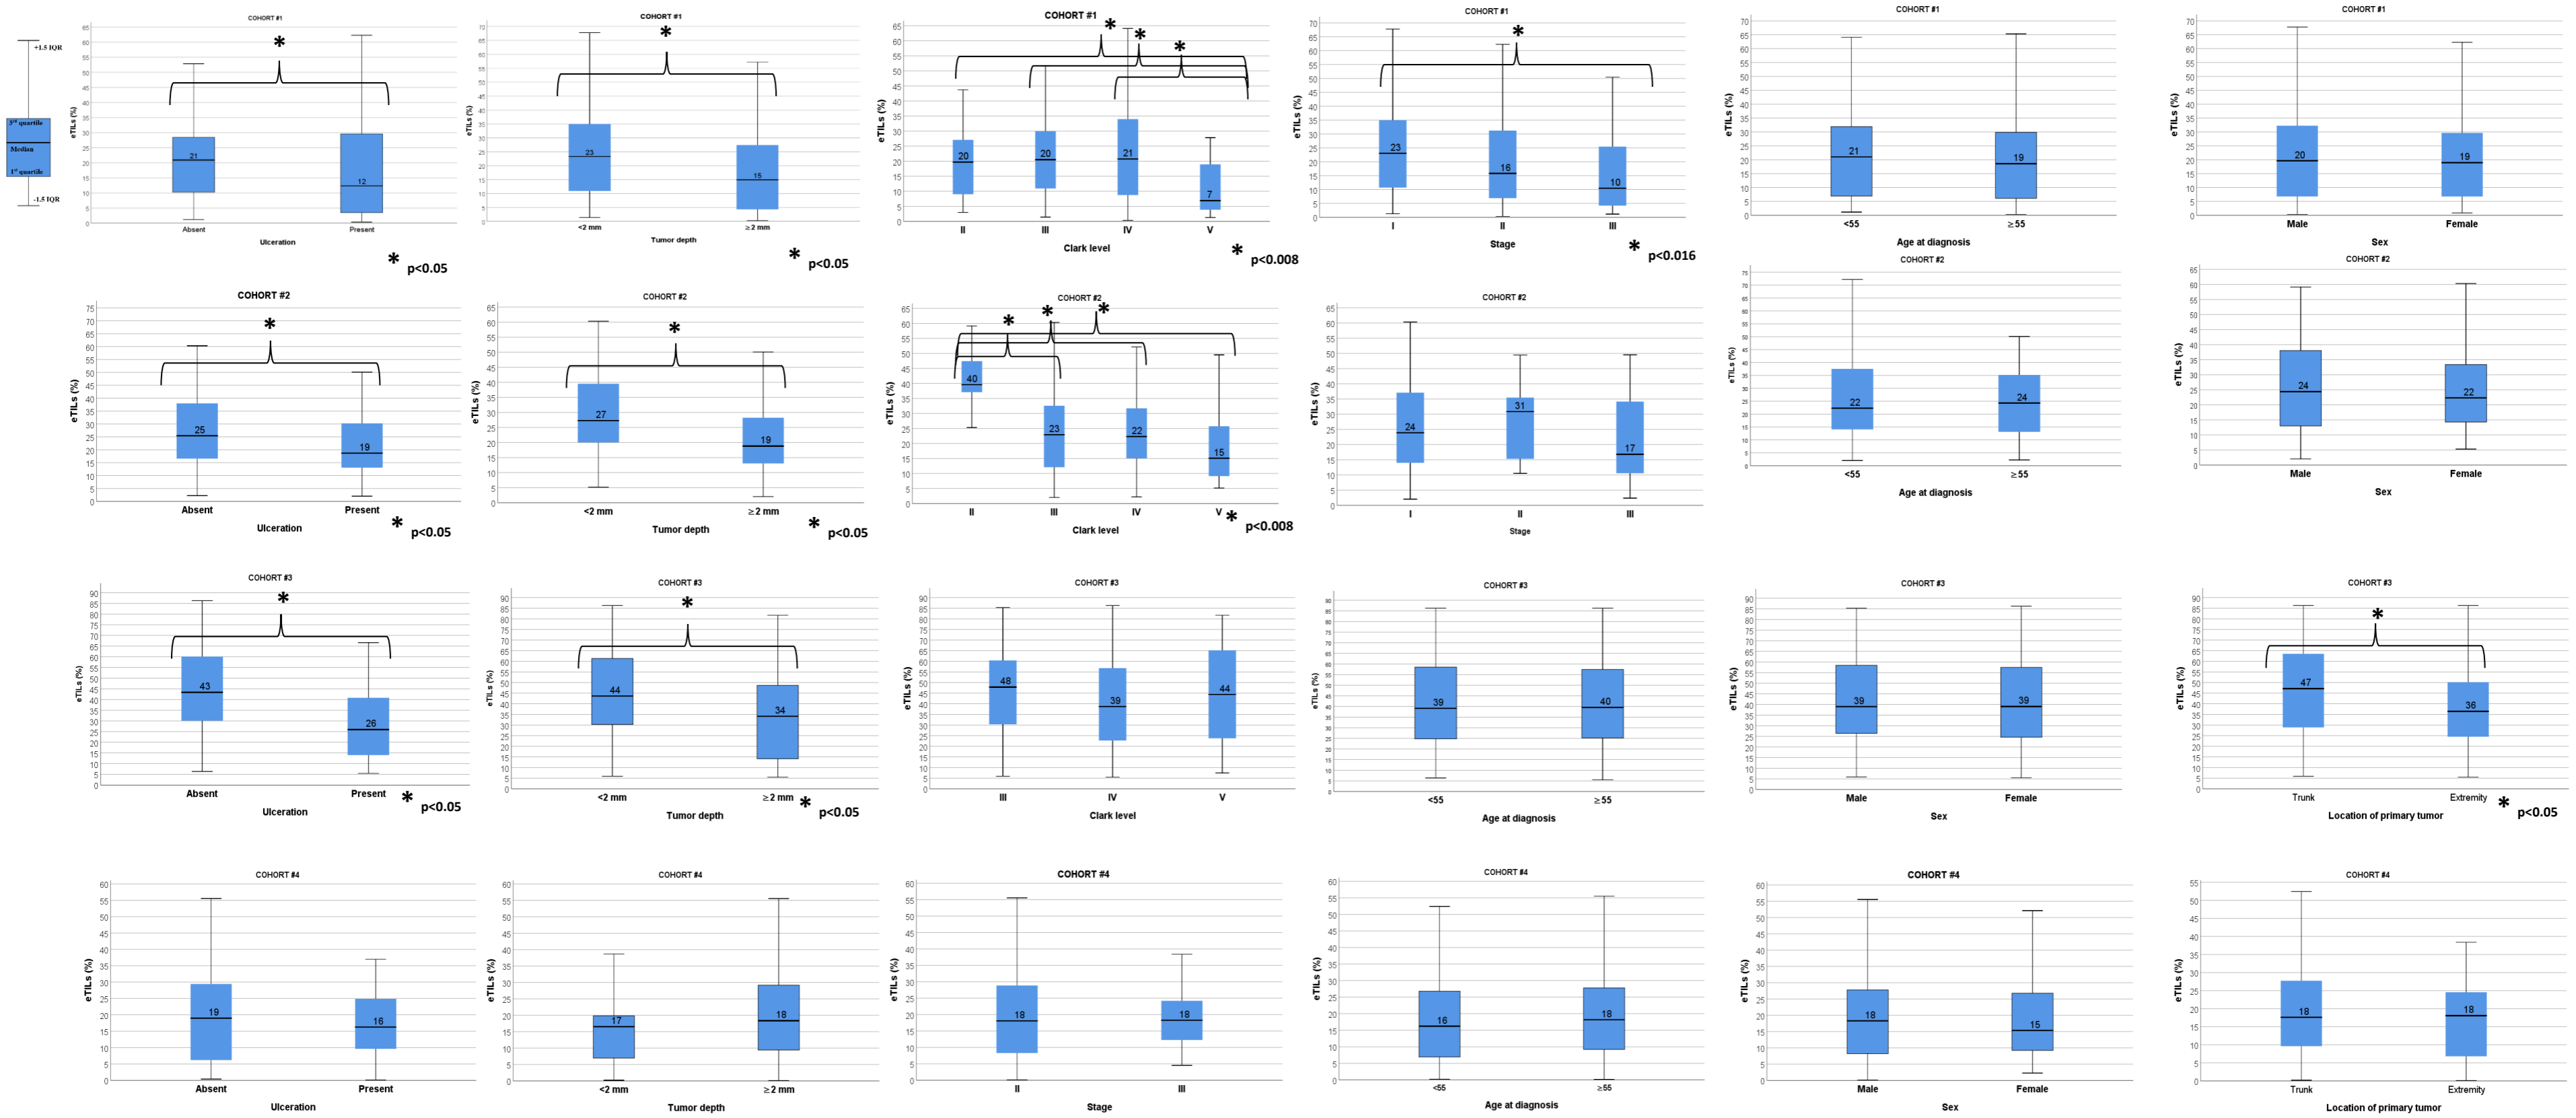

Supplementary Figure 2

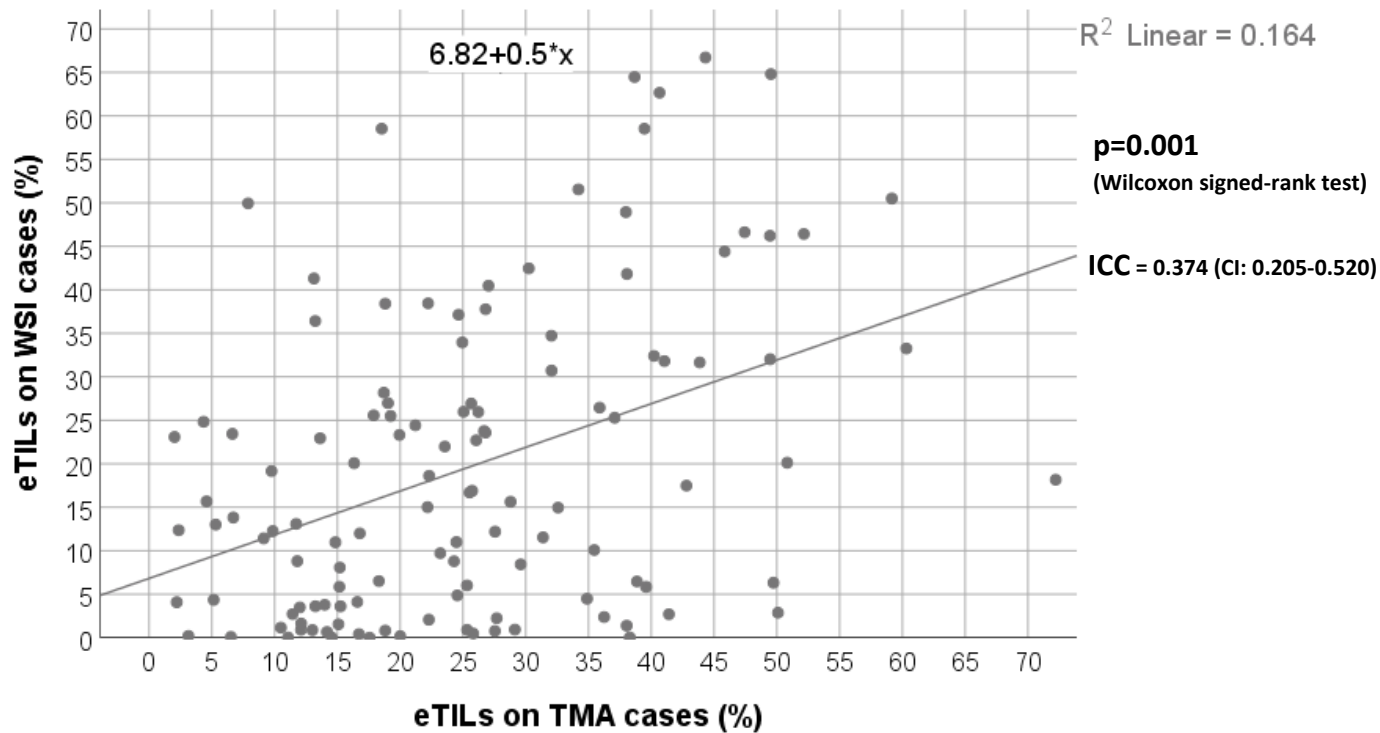

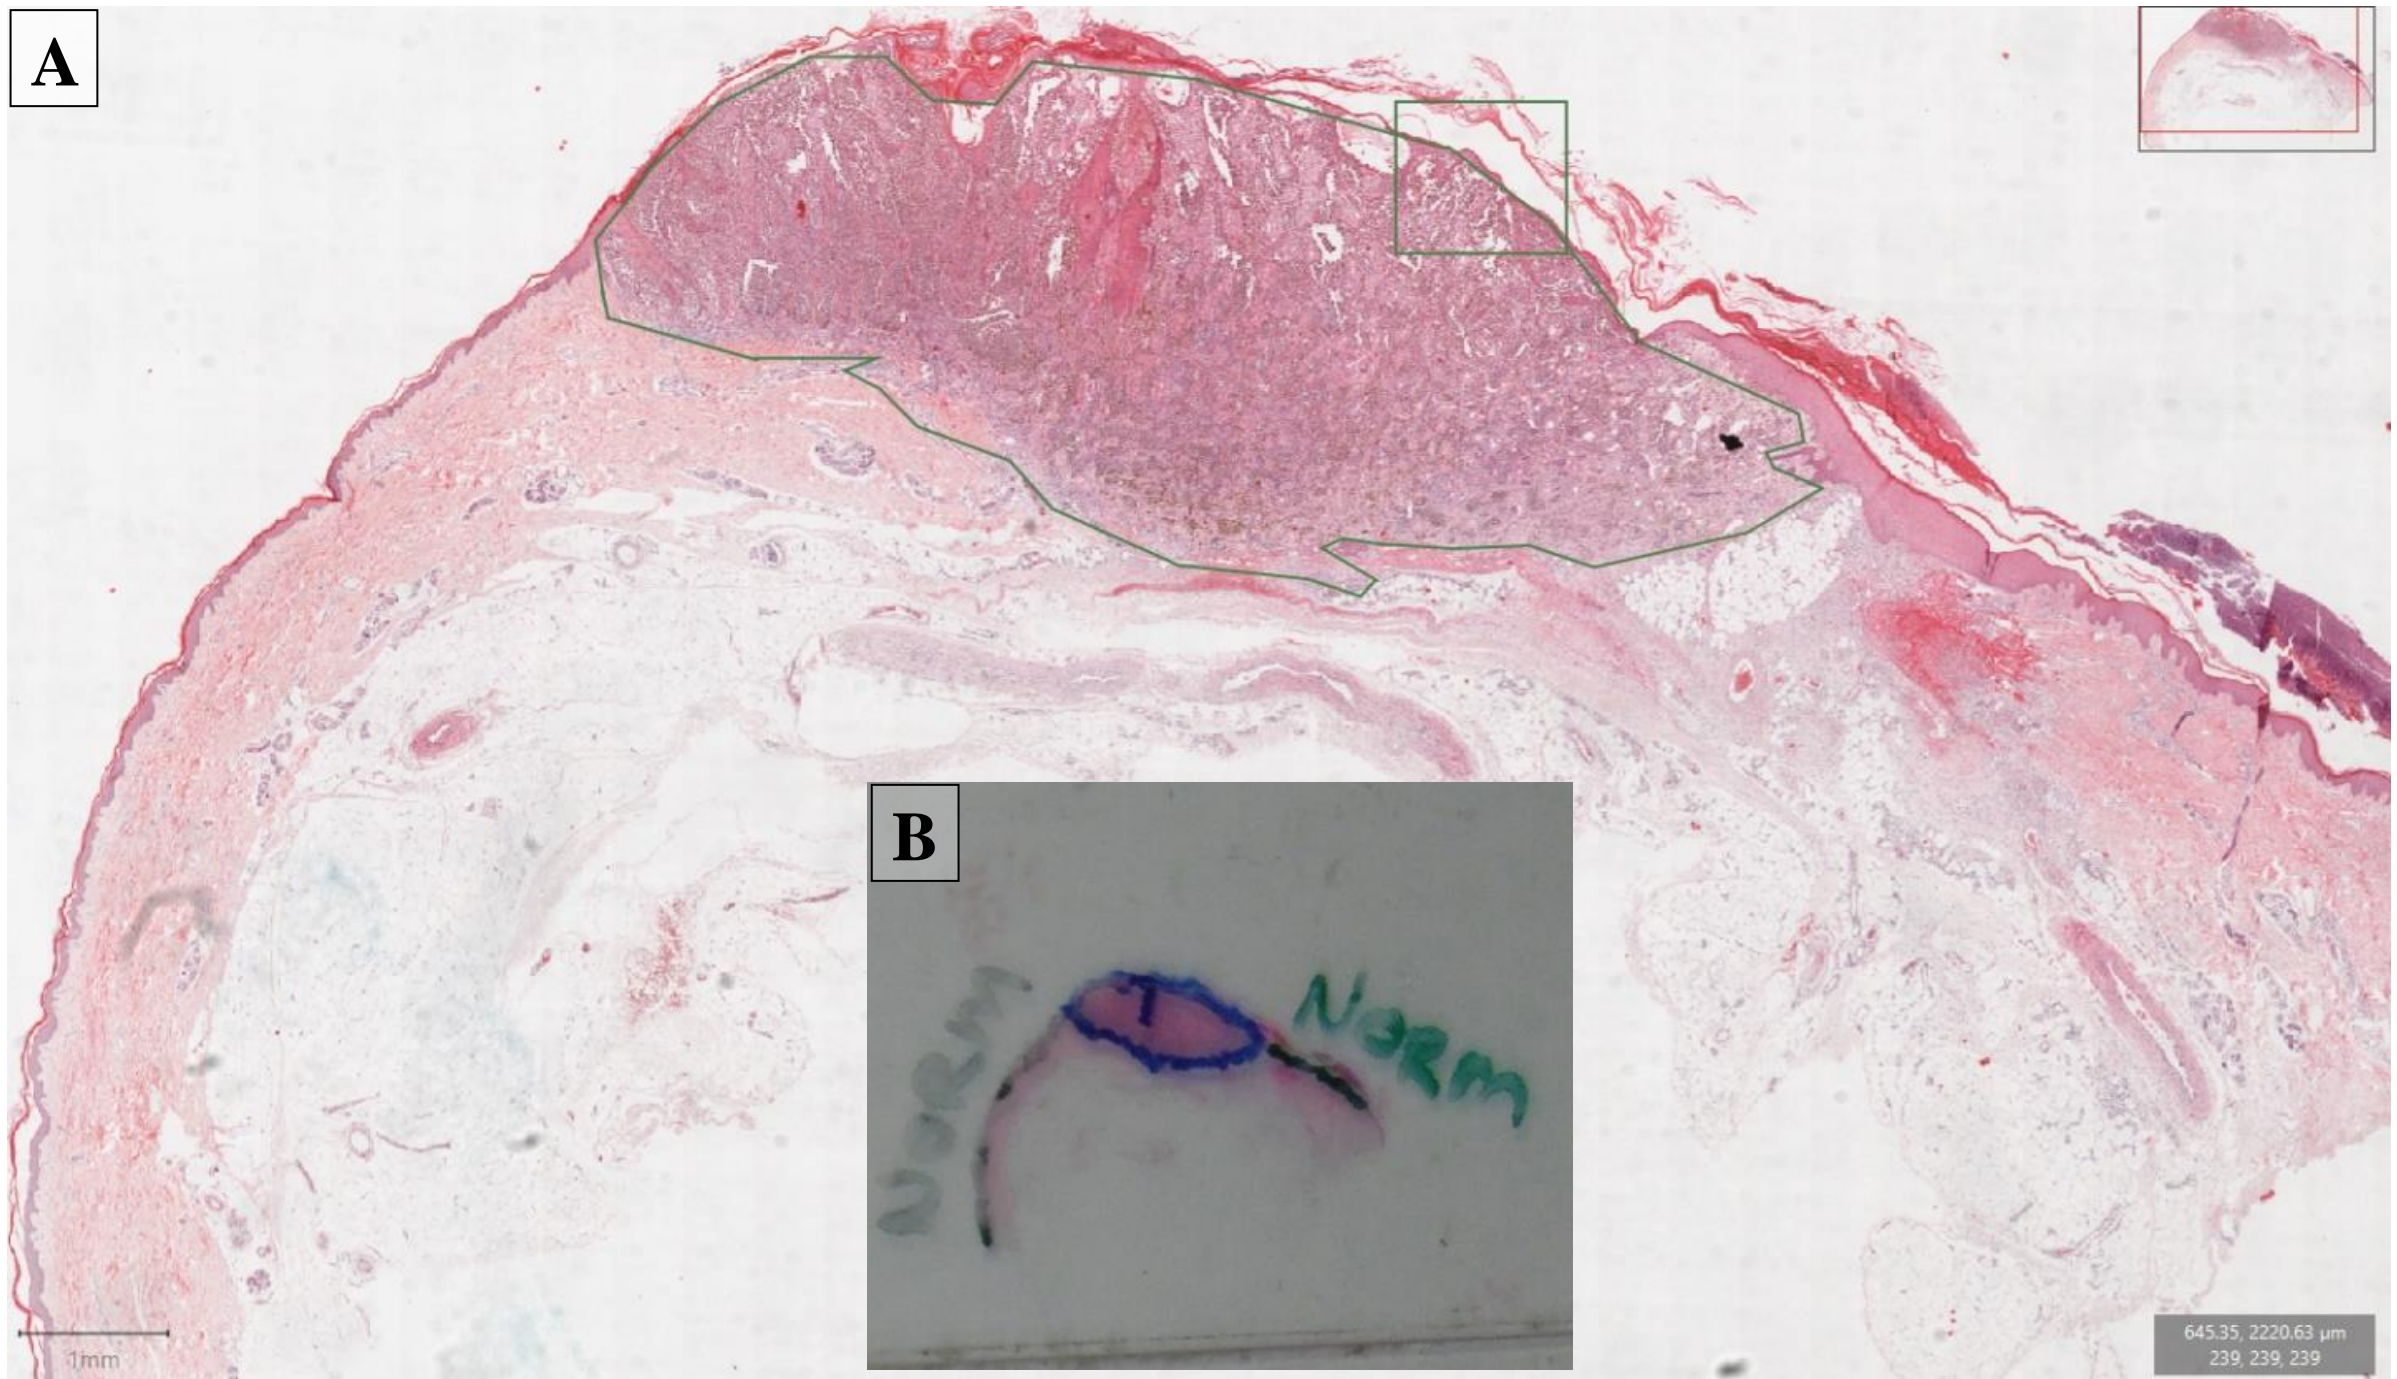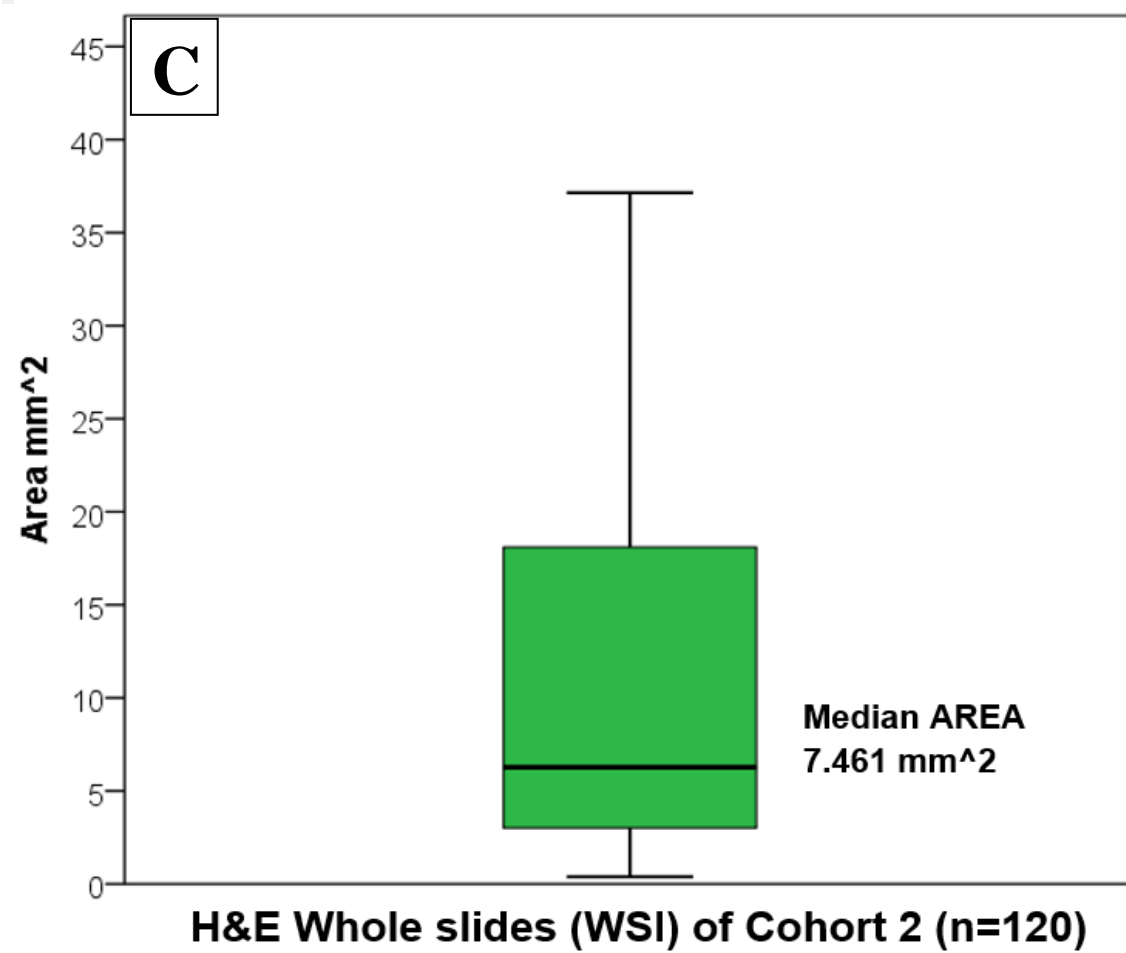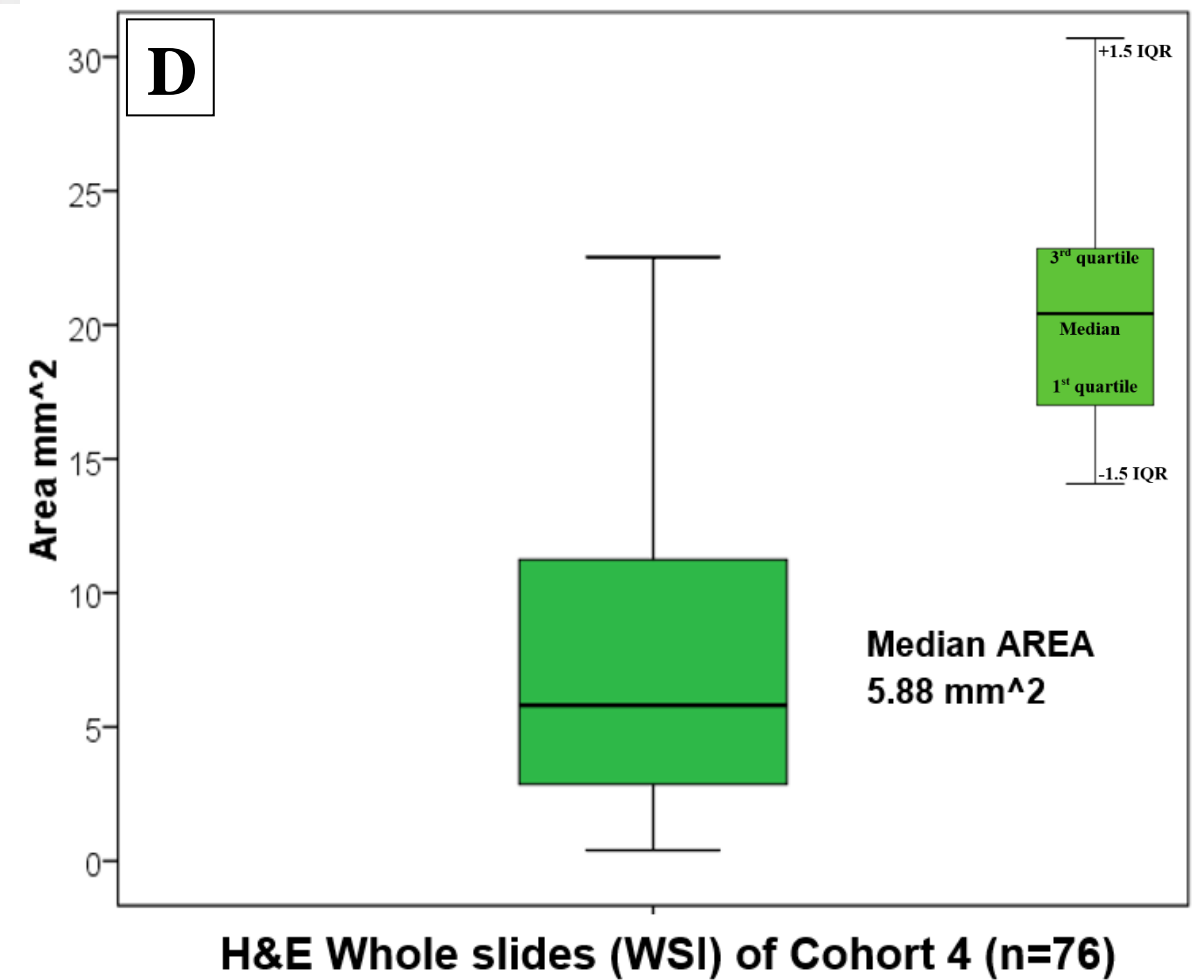

Supplement: 41467_2019_13043_MOESM1_ESM.pdf [file 41467_2019_13043_MOESM1_ESM.pdf]
