# Supplementary material for: An open source automated tumor infiltrating lymphocyte algorithm for prognosis in melanoma
Source: PubMed Central journal article supplement (PMC6884485; doi:10.1038/s41467-019-13043-2), 2019-11-29
Supplement: 41467_2019_13043_MOESM3_ESM.pdf [file 41467_2019_13043_MOESM3_ESM.pdf]

## Reporting Summary

Nature Research wishes to improve the reproducibility of the work that we publish. This form provides structure for consistency and transparency in reporting. For further information on Nature Research policies, see [Authors & Referees](#) and the [Editorial Policy Checklist](#).

### Statistics

For all statistical analyses, confirm that the following items are present in the figure legend, table legend, main text, or Methods section.

n/a Confirmed

- The exact sample size ( $n$ ) for each experimental group/condition, given as a discrete number and unit of measurement
- A statement on whether measurements were taken from distinct samples or whether the same sample was measured repeatedly
- The statistical test(s) used AND whether they are one- or two-sided  
*Only common tests should be described solely by name; describe more complex techniques in the Methods section.*
- A description of all covariates tested
- A description of any assumptions or corrections, such as tests of normality and adjustment for multiple comparisons
- A full description of the statistical parameters including central tendency (e.g. means) or other basic estimates (e.g. regression coefficient) AND variation (e.g. standard deviation) or associated estimates of uncertainty (e.g. confidence intervals)
- For null hypothesis testing, the test statistic (e.g.  $F$ ,  $t$ ,  $r$ ) with confidence intervals, effect sizes, degrees of freedom and  $P$  value noted  
*Give  $P$  values as exact values whenever suitable.*
- For Bayesian analysis, information on the choice of priors and Markov chain Monte Carlo settings
- For hierarchical and complex designs, identification of the appropriate level for tests and full reporting of outcomes
- Estimates of effect sizes (e.g. Cohen's  $d$ , Pearson's  $r$ ), indicating how they were calculated

*Our web collection on [statistics for biologists](#) contains articles on many of the points above.*

### Software and code

Policy information about [availability of computer code](#)

Data collection

For data collection, we used an open source software called QuPath. The software and its documentation can be found at <https://qupath.github.io/>

Data analysis

We used watershed cell detection to segment the cells in the image with the following settings: Detection image: Hematoxylin OD; Requested pixel size: 0.5  $\mu\text{m}$ ; Background radius: 8  $\mu\text{m}$ ; Median filter radius: 0  $\mu\text{m}$ ; sigma: 1.5  $\mu\text{m}$ ; Minimum cell area: 10  $\mu\text{m}^2$ ; Maximum cell area: 400  $\mu\text{m}^2$ ; Threshold: 0.1; Maximum background intensity: 2. In order to classify detected cells into tumor cells, immune cells (TILs), stromal cells and others (false detections, background), we used neural network as a machine learning method with 8 hidden layers (maximum iterations: 100). The features used in the classification are listed below.

Nucleus: Area  
 Nucleus: Perimeter  
 Nucleus: Circularity  
 Nucleus: Max caliper  
 Nucleus: Min caliper  
 Nucleus: Eccentricity  
 Nucleus: Hematoxylin OD mean  
 Nucleus: Hematoxylin OD sum  
 Nucleus: Hematoxylin OD std dev  
 Nucleus: Hematoxylin OD max  
 Nucleus: Hematoxylin OD min  
 Nucleus: Hematoxylin OD range  
 Nucleus: Eosin OD mean  
 Nucleus: Eosin OD sum  
 Nucleus: Eosin OD std dev  
 Nucleus: Eosin OD max

Nucleus: Eosin OD min  
Nucleus: Eosin OD range  
Cell: Area  
Cell: Perimeter  
Cell: Circularity  
Cell: Max caliper  
Cell: Min caliper  
Cell: Eccentricity  
Cell: Eosin OD mean  
Cell: Eosin OD std dev  
Cell: Eosin OD max  
Cell: Eosin OD min  
Cytoplasm: Eosin OD mean  
Cytoplasm: Eosin OD std dev  
Cytoplasm: Eosin OD max  
Cytoplasm: Eosin OD min  
Nucleus/Cell area ratio  
Smoothed: 25  $\mu$ m: Nucleus: Area  
Smoothed: 25  $\mu$ m: Nucleus: Perimeter  
Smoothed: 25  $\mu$ m: Nucleus: Circularity  
Smoothed: 25  $\mu$ m: Nucleus: Max caliper  
Smoothed: 25  $\mu$ m: Nucleus: Min caliper  
Smoothed: 25  $\mu$ m: Nucleus: Eccentricity  
Smoothed: 25  $\mu$ m: Nucleus: Hematoxylin OD mean  
Smoothed: 25  $\mu$ m: Nucleus: Hematoxylin OD sum  
Smoothed: 25  $\mu$ m: Nucleus: Hematoxylin OD std dev  
Smoothed: 25  $\mu$ m: Nucleus: Hematoxylin OD max  
Smoothed: 25  $\mu$ m: Nucleus: Hematoxylin OD min  
Smoothed: 25  $\mu$ m: Nucleus: Hematoxylin OD range  
Smoothed: 25  $\mu$ m: Nucleus: Eosin OD mean  
Smoothed: 25  $\mu$ m: Nucleus: Eosin OD sum  
Smoothed: 25  $\mu$ m: Nucleus: Eosin OD std dev  
Smoothed: 25  $\mu$ m: Nucleus: Eosin OD max  
Smoothed: 25  $\mu$ m: Nucleus: Eosin OD min  
Smoothed: 25  $\mu$ m: Nucleus: Eosin OD range  
Smoothed: 25  $\mu$ m: Cell: Area  
Smoothed: 25  $\mu$ m: Cell: Perimeter  
Smoothed: 25  $\mu$ m: Cell: Circularity  
Smoothed: 25  $\mu$ m: Cell: Max caliper  
Smoothed: 25  $\mu$ m: Cell: Min caliper  
Smoothed: 25  $\mu$ m: Cell: Eccentricity  
Smoothed: 25  $\mu$ m: Cell: Eosin OD mean  
Smoothed: 25  $\mu$ m: Cell: Eosin OD std dev  
Smoothed: 25  $\mu$ m: Cell: Eosin OD max  
Smoothed: 25  $\mu$ m: Cell: Eosin OD min  
Smoothed: 25  $\mu$ m: Cytoplasm: Eosin OD mean  
Smoothed: 25  $\mu$ m: Cytoplasm: Eosin OD std dev  
Smoothed: 25  $\mu$ m: Cytoplasm: Eosin OD max  
Smoothed: 25  $\mu$ m: Cytoplasm: Eosin OD min  
Smoothed: 25  $\mu$ m: Nucleus/Cell area ratio  
Smoothed: 25  $\mu$ m: Nearby detection counts  
Smoothed: 50  $\mu$ m: Nucleus: Area  
Smoothed: 50  $\mu$ m: Nucleus: Perimeter  
Smoothed: 50  $\mu$ m: Nucleus: Circularity  
Smoothed: 50  $\mu$ m: Nucleus: Max caliper  
Smoothed: 50  $\mu$ m: Nucleus: Min caliper  
Smoothed: 50  $\mu$ m: Nucleus: Eccentricity  
Smoothed: 50  $\mu$ m: Nucleus: Hematoxylin OD mean  
Smoothed: 50  $\mu$ m: Nucleus: Hematoxylin OD sum  
Smoothed: 50  $\mu$ m: Nucleus: Hematoxylin OD std dev  
Smoothed: 50  $\mu$ m: Nucleus: Hematoxylin OD max  
Smoothed: 50  $\mu$ m: Nucleus: Hematoxylin OD min  
Smoothed: 50  $\mu$ m: Nucleus: Hematoxylin OD range  
Smoothed: 50  $\mu$ m: Nucleus: Eosin OD mean  
Smoothed: 50  $\mu$ m: Nucleus: Eosin OD sum  
Smoothed: 50  $\mu$ m: Nucleus: Eosin OD std dev  
Smoothed: 50  $\mu$ m: Nucleus: Eosin OD max  
Smoothed: 50  $\mu$ m: Nucleus: Eosin OD min

Smoothed: 50  $\mu\text{m}$ : Nucleus: Eosin OD range

Smoothed: 50  $\mu\text{m}$ : Cell: Area

Smoothed: 50  $\mu\text{m}$ : Cell: Perimeter

Smoothed: 50  $\mu\text{m}$ : Cell: Circularity

Smoothed: 50  $\mu\text{m}$ : Cell: Max caliper

Smoothed: 50  $\mu\text{m}$ : Cell: Min caliper

Smoothed: 50  $\mu\text{m}$ : Cell: Eccentricity

Smoothed: 50  $\mu\text{m}$ : Cell: Eosin OD mean

Smoothed: 50  $\mu\text{m}$ : Cell: Eosin OD std dev

Smoothed: 50  $\mu\text{m}$ : Cell: Eosin OD max

Smoothed: 50  $\mu\text{m}$ : Cell: Eosin OD min

Smoothed: 50  $\mu\text{m}$ : Cytoplasm: Eosin OD mean

Smoothed: 50  $\mu\text{m}$ : Cytoplasm: Eosin OD std dev

Smoothed: 50  $\mu\text{m}$ : Cytoplasm: Eosin OD max

Smoothed: 50  $\mu\text{m}$ : Cytoplasm: Eosin OD min

Smoothed: 50  $\mu\text{m}$ : Nucleus/Cell area ratio

Smoothed: 50  $\mu\text{m}$ : Nearby detection counts

In order to help the algorithm perform an accurate classification, we also added smoothed object features at 25  $\mu\text{m}$  and 50  $\mu\text{m}$  radius to supplement the existing measurements of individual cells. Our algorithm (NN192) is available upon request and will be publicly available after publication.

For manuscripts utilizing custom algorithms or software that are central to the research but not yet described in published literature, software must be made available to editors/reviewers. We strongly encourage code deposition in a community repository (e.g. GitHub). See the Nature Research [guidelines for submitting code & software](#) for further information.

## Data

Policy information about [availability of data](#)

All manuscripts must include a [data availability statement](#). This statement should provide the following information, where applicable:

- Accession codes, unique identifiers, or web links for publicly available datasets
- A list of figures that have associated raw data
- A description of any restrictions on data availability

*Provide your data availability statement here.*

## Field-specific reporting

Please select the one below that is the best fit for your research. If you are not sure, read the appropriate sections before making your selection.

Life sciences       Behavioural & social sciences       Ecological, evolutionary & environmental sciences

For a reference copy of the document with all sections, see [nature.com/documents/nr-reporting-summary-flat.pdf](https://www.nature.com/documents/nr-reporting-summary-flat.pdf)

## Life sciences study design

All studies must disclose on these points even when the disclosure is negative.

|                 |                                                                                                                                                                                                                                                                             |
|-----------------|-----------------------------------------------------------------------------------------------------------------------------------------------------------------------------------------------------------------------------------------------------------------------------|
| Sample size     | <i>Describe how sample size was determined, detailing any statistical methods used to predetermine sample size OR if no sample-size calculation was performed, describe how sample sizes were chosen and provide a rationale for why these sample sizes are sufficient.</i> |
| Data exclusions | <i>Describe any data exclusions. If no data were excluded from the analyses, state so OR if data were excluded, describe the exclusions and the rationale behind them, indicating whether exclusion criteria were pre-established.</i>                                      |
| Replication     | <i>Describe the measures taken to verify the reproducibility of the experimental findings. If all attempts at replication were successful, confirm this OR if there are any findings that were not replicated or cannot be reproduced, note this and describe why.</i>      |
| Randomization   | <i>Describe how samples/organisms/participants were allocated into experimental groups. If allocation was not random, describe how covariates were controlled OR if this is not relevant to your study, explain why.</i>                                                    |
| Blinding        | <i>Describe whether the investigators were blinded to group allocation during data collection and/or analysis. If blinding was not possible, describe why OR explain why blinding was not relevant to your study.</i>                                                       |

## Reporting for specific materials, systems and methods

We require information from authors about some types of materials, experimental systems and methods used in many studies. Here, indicate whether each material, system or method listed is relevant to your study. If you are not sure if a list item applies to your research, read the appropriate section before selecting a response.

## Materials &amp; experimental systems

| n/a                                 | Involvement                                          |
|-------------------------------------|------------------------------------------------------|
| <input checked="" type="checkbox"/> | <input type="checkbox"/> Antibodies                  |
| <input checked="" type="checkbox"/> | <input type="checkbox"/> Eukaryotic cell lines       |
| <input checked="" type="checkbox"/> | <input type="checkbox"/> Palaeontology               |
| <input checked="" type="checkbox"/> | <input type="checkbox"/> Animals and other organisms |
| <input checked="" type="checkbox"/> | <input type="checkbox"/> Human research participants |
| <input type="checkbox"/>            | <input checked="" type="checkbox"/> Clinical data    |

## Methods

| n/a                                 | Involvement                                     |
|-------------------------------------|-------------------------------------------------|
| <input checked="" type="checkbox"/> | <input type="checkbox"/> ChIP-seq               |
| <input checked="" type="checkbox"/> | <input type="checkbox"/> Flow cytometry         |
| <input checked="" type="checkbox"/> | <input type="checkbox"/> MRI-based neuroimaging |

## Clinical data

Policy information about [clinical studies](#)

All manuscripts should comply with the ICMJE [guidelines for publication of clinical research](#) and a completed [CONSORT checklist](#) must be included with all submissions.

Clinical trial registration

*Provide the trial registration number from ClinicalTrials.gov or an equivalent agency.*

Study protocol

*Note where the full trial protocol can be accessed OR if not available, explain why.*

Data collection

*Describe the settings and locales of data collection, noting the time periods of recruitment and data collection.*

Outcomes

*Describe how you pre-defined primary and secondary outcome measures and how you assessed these measures.*
